# Supplementary material for: Phenanthroimidazole derivatives showing mild intramolecular charge transfer and high quantum yields and their applications in OLEDs
Source: Royal Society of Chemistry journal article supplement (doi:10.1039/d1nj02134f), 2021-01-01
Supplement: d1nj02134f1.pdf [file d1nj02134f1.pdf]

## Supporting Information

### **Phenanthroimidazole derivatives showing mild intramolecular charge transfer, high quantum yield and their applications in OLEDs**

Swati J. N. Dixit<sup>1</sup>, Chandan Gupta<sup>2</sup>, Tanveer H. Tadavi<sup>1</sup>, K. R. S. Chandrakumar<sup>3</sup>, Sangita Bose<sup>2</sup> and

Neeraj Agarwal<sup>1\*</sup>

---

#### **Contents:**

**Figure SI 1:** <sup>1</sup>H NMR (top) and <sup>13</sup>C NMR (bottom) spectra of **1** in CDCl<sub>3</sub>.

**Figure SI 2:** MALDI – TOF spectrum of **1**.

**Figure SI 3:** Cyclic voltammetry of **1**.

**Figure SI 4:** Absorption and emission spectra of **1** in different solvents.

**Table SI 1:** Absorption and emission data of **1** in different solvents.

**Figure SI 5:** Fluorescence decay spectra of **1** in different solvents.

**Table SI 2:** Fluorescence decay data of **1** in different solvents.

**Figure SI 6:** <sup>1</sup>H NMR (top) and <sup>13</sup>C NMR (bottom) spectra of **2** in CDCl<sub>3</sub>.

**Figure SI 7:** HRMS spectrum of **2**.

**Figure SI 8:** Cyclic voltammetry of **2**.

**Figure SI 9:** Absorption and emission spectra of **2** in different solvents.

**Table SI 3:** Absorption and emission data of **2** in different solvents.

**Figure SI 10:** Fluorescence decay spectra of **2** in different solvents.

**Table SI 4:** Fluorescence decay data of **2** in different solvents.

**Figure SI 11:** <sup>1</sup>H NMR (top) and <sup>13</sup>C NMR (bottom) spectra of **3** in CDCl<sub>3</sub>.

**Figure SI 12:** HRMS spectrum of **3**.

**Figure SI 13:** Cyclic voltammetry of **3**.

**Figure SI 14:** Absorption and emission spectra of **3** in different solvents.

**Table SI 5:** Absorption and emission data of **3** in different solvents.

**Figure SI 15:** Fluorescence decay spectra of **3** in different solvents.

**Table SI 6:** Fluorescence decay data of **3** in different solvents.

**Figure SI 16:** <sup>1</sup>H NMR (top) and <sup>13</sup>C NMR (bottom) spectra of **4** in CDCl<sub>3</sub>.

**Figure SI 17:** MALDI – TOF spectrum of **4**.

**Figure SI 18:** Cyclic voltammetry of **4**.

**Figure SI 19:** Absorption and emission spectra of **4** in different solvents.

**Table SI 7:** Absorption and emission data of **4** in different solvents.

**Figure SI 20:** Fluorescence decay spectra of **4** in different solvents

**Table SI 8:** Fluorescence decay data of **4** in different solvents.

**Figure SI 21:**  $^1\text{H}$  NMR (top) and  $^{13}\text{C}$  NMR (bottom) spectra of **5** in  $\text{CDCl}_3$ .

**Figure SI 22:** HRMS spectrum of **5**.

**Figure SI 23:** Cyclic voltammetry of **5**.

**Figure SI 24:** Absorption and emission spectra of **5** in different solvents.

**Table SI 9:** Absorption and emission data of **5** in different solvents.

**Figure SI 25:** Fluorescence decay spectra of **5** in different solvents.

**Table SI 10:** Fluorescence decay data of **5** in different solvents.

**Figure SI 26:**  $^1\text{H}$  NMR spectra of **6** in  $\text{CDCl}_3$ .

**Figure SI 27:** Cyclic voltammetry of **6**.

**Figure SI 28:** Absorption and emission spectra of **6** in different solvents.

**Table SI 11:** Absorption and emission data of **6** in different solvents.

**Figure SI 29:** Fluorescence decay spectra of **6** in different solvents.

**Table SI 12:** Fluorescence decay data of **6** in different solvents.

**Figure SI 30:**  $^1\text{H}$  NMR (top) and  $^{13}\text{C}$  NMR (bottom) spectra of **7** in  $\text{CDCl}_3$ .

**Figure SI 31:** MALDI – TOF spectrum of **7**.

**Figure SI 32:** Cyclic voltammetry of **7**.

**Figure SI 33:** Absorption and emission spectra of **7** in different solvents.

**Table SI 13:** Absorption and emission data of **7** in different solvents.

**Figure SI 34:** Fluorescence decay spectra of **7** in different solvents.

**Table SI 14:** Fluorescence decay data of **7** in different solvents.

**Figure SI 35:** Emission spectra in thin films of **1-7**, PVK and their blends with PVK.

**Figure SI 36:** Electroluminescence of OLEDs fabricated from **5** at different driving voltage

## Characterization and Spectroscopic data of **1**

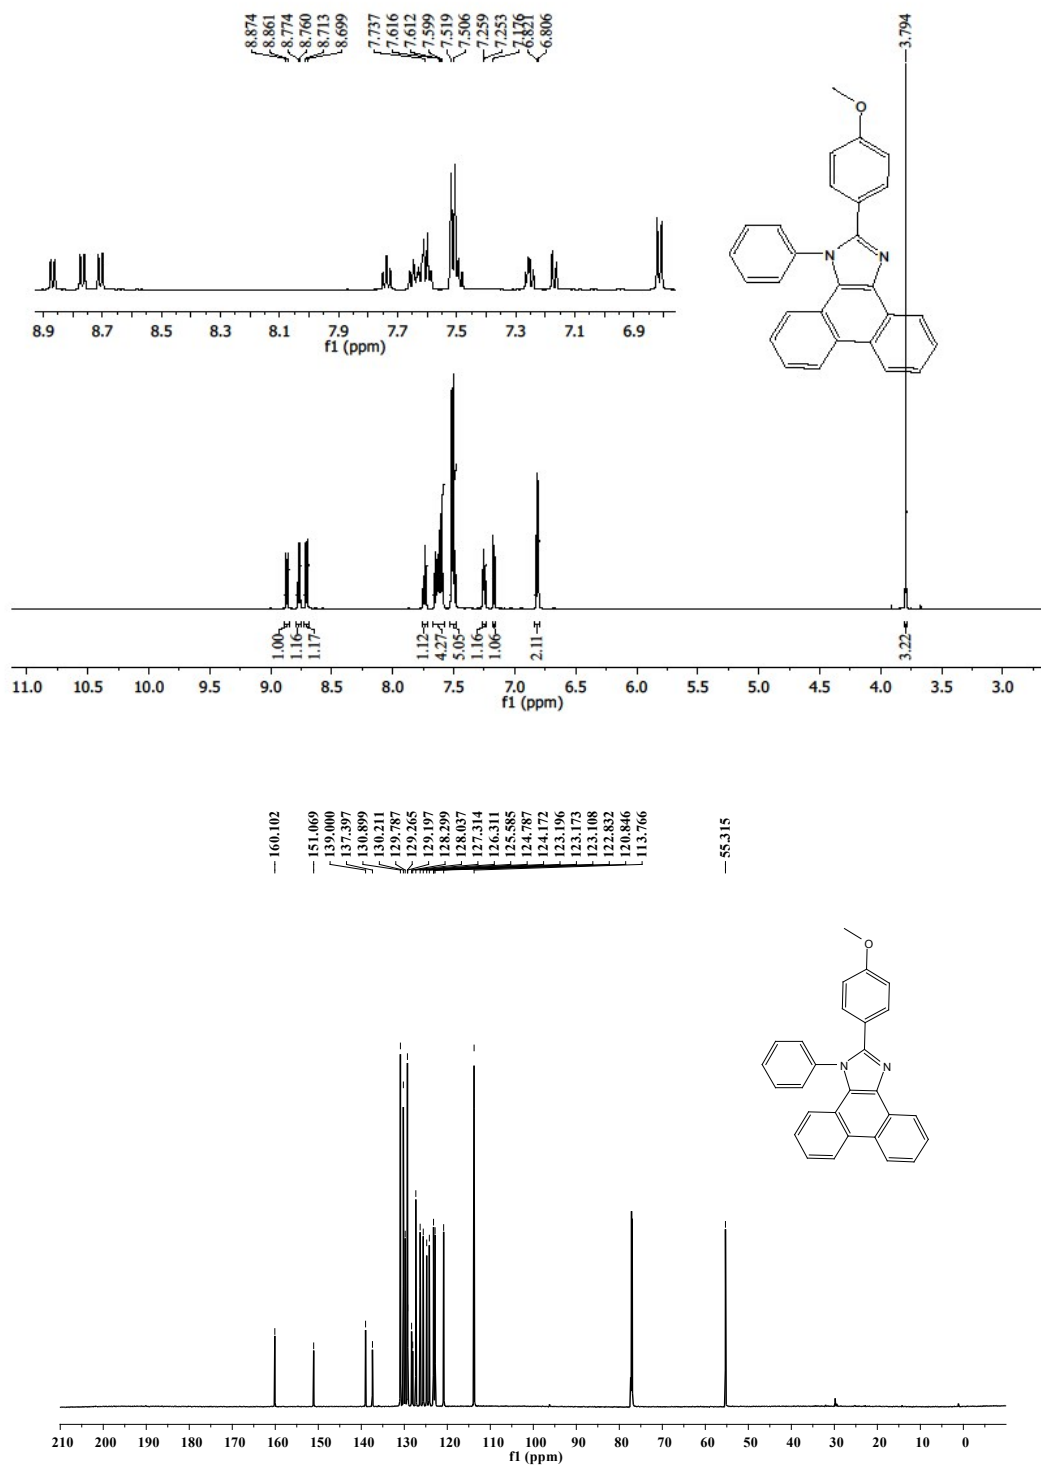

Figure SI 1:  $^1\text{H}$  NMR (top) and  $^{13}\text{C}$  NMR (bottom) spectra of **1** in  $\text{CDCl}_3$

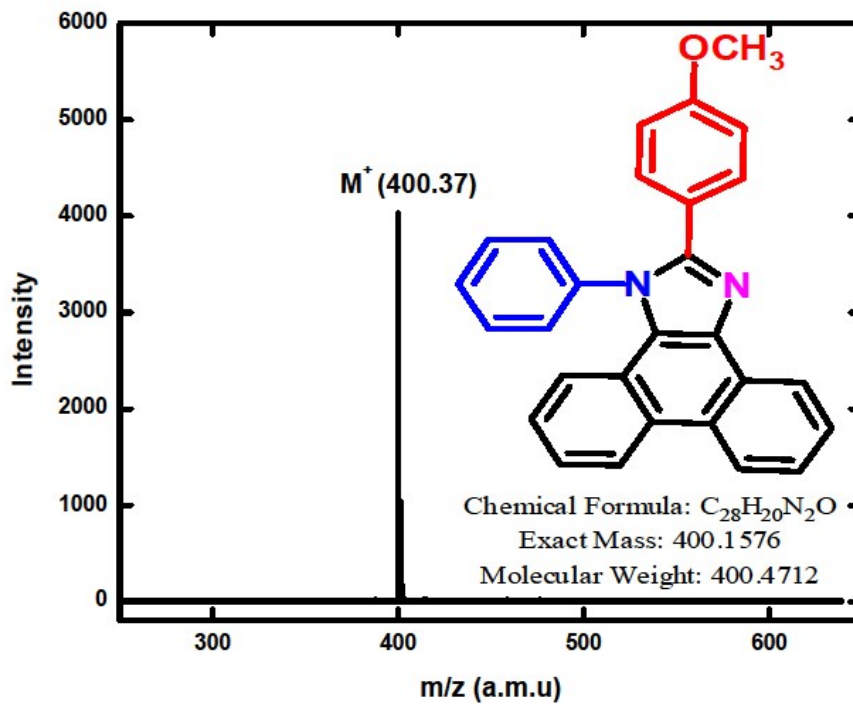

Figure SI 2: MALDI – TOF spectrum for 1

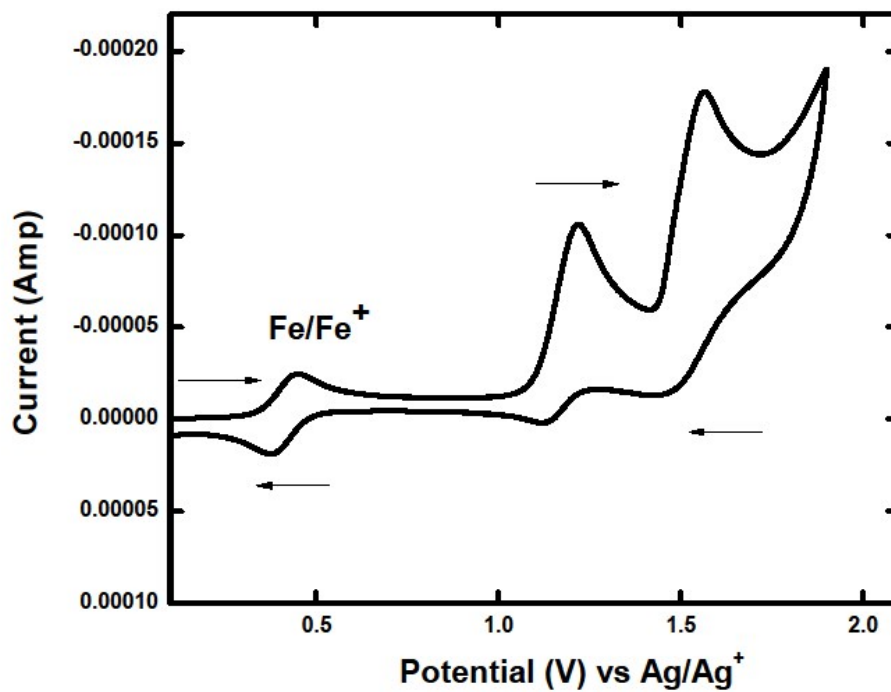

Figure SI 3: Cyclic voltammetry of 1.

Photophysical studies:

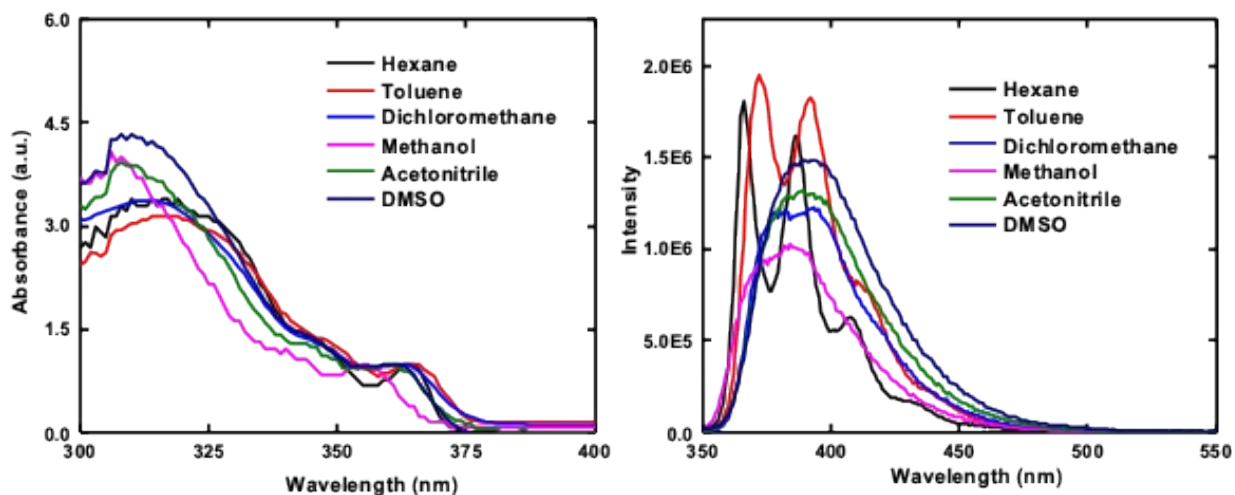

Figure SI 4: Absorption and emission spectra of **1** in different solvents

Table SI 1: Absorption and emission data of **1** in different solvents

| Solvent            | $\lambda_{\text{abs}}$ [nm], ( $\log \epsilon$ ) | $\lambda_{\text{em}}$ (nm) | Stoke shift ( $\text{cm}^{-1}$ ) | $\Phi_{\text{F}}$ | $E_{\text{g}}$ (eV) |
|--------------------|--------------------------------------------------|----------------------------|----------------------------------|-------------------|---------------------|
| Hexane             | 364 (3.64), 345 (3.78), 316 (4.15), 261 (4.60)   | 366, 386, 407              | 1570                             | 33                | 3.43                |
| Toluene            | 364(3.84), 318(4.33), 288(4.35)                  | 372, 391                   | 1900                             | 41                | 3.40                |
| DCM                | 363(4.48), 315(4.98), 263(5.43)                  | 377, 392                   | 2030                             | 38                | 3.43                |
| CH <sub>3</sub> OH | 356(3.64), 308(4.23), 258(4.75)                  | 381                        | 1840                             | 45                | 3.59                |
| CH <sub>3</sub> CN | 361(3.73), 309(4.33), 260(4.89)                  | 387                        | 1870                             | 40                | 3.43                |
| DMSO               | 362(4.06), 310(4.63), 262(5.21)                  | 391                        | 2050                             | 53                | 3.47                |

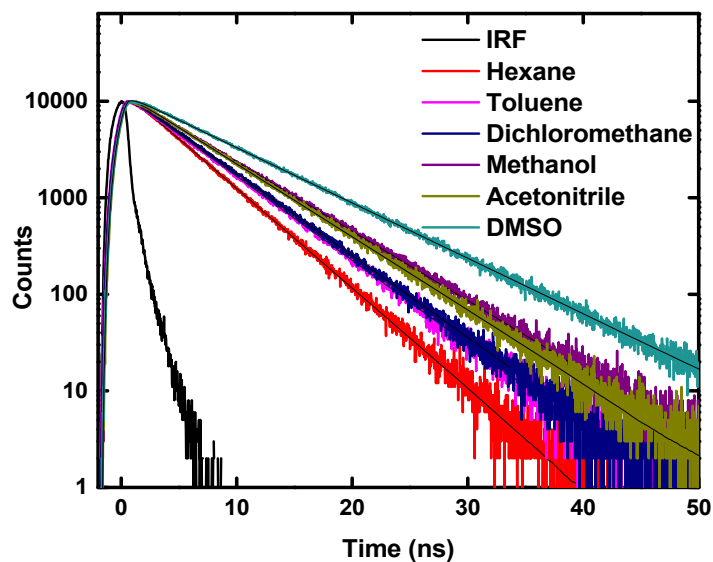

**Figure SI 5:** Fluorescence decay spectra of **1** in different solvents

**Table SI 2:** Fluorescence decay data of **1** in different solvents

| Solvent            | $\lambda_{em}(nm)$ | $\tau_1(ns)$ | $\alpha$ | Chi sq |
|--------------------|--------------------|--------------|----------|--------|
| Hexane             | 407                | 4.21         | 100      | 1.00   |
| Toluene            | 391                | 4.99         | 100      | 1.15   |
| DCM                | 392                | 5.11         | 100      | 1.20   |
| CH <sub>3</sub> OH | 381                | 6.05         | 100      | 1.07   |
| CH <sub>3</sub> CN | 387                | 5.76         | 100      | 1.00   |
| DMSO               | 391                | 7.59         | 100      | 1.15   |

## Characterization and Spectroscopic data of 2

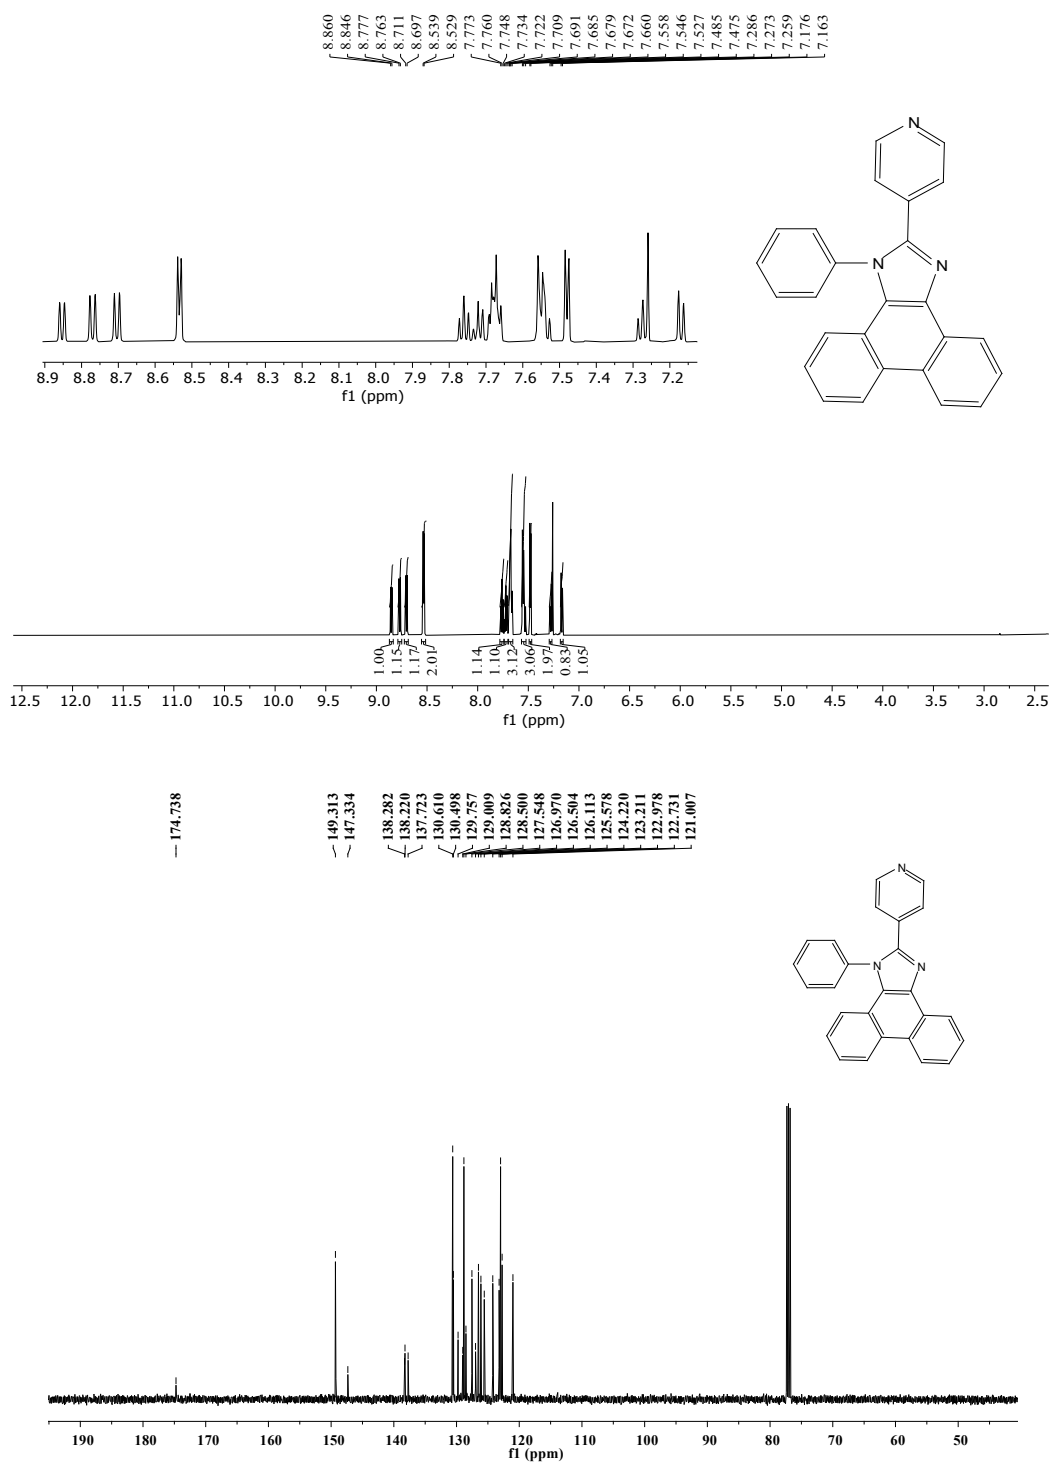

Figure SI 6:  $^1\text{H}$  NMR (top) and  $^{13}\text{C}$  NMR (bottom) spectra of **2** in  $\text{CDCl}_3$

DEPARTMENT OF CHEMISTRY, I.I.T.(B)

Analysis Info  
 Analysis Name D:\Data\JUNE 2021\MR-NEERAJ-2.d  
 Method NaICsl\_pos\_1000.m  
 Sample Name MR-NEERAJ-2  
 Comment C26H17N3  
 Acquisition Date 6/8/2021 4:21:08 PM  
 Operator sjg in  
 Instrument maXis impact 282001.00081

Acquisition Parameter  
 Source Type ESI Ion Polarity Positive Set Nebulzer 0.3 Bar  
 Focus Not active Set Capillary 3700 V Set Dry Heater 180 °C  
 Scan Begin 50 m/z Set End Plate Offset -500 V Set Dry Gas 4.0 l/min  
 Scan End 1000 m/z Set Charging Voltage 2000 V Set Divert Valve Source  
 Set Corona 0 nA Set APCI Heater 0 °C

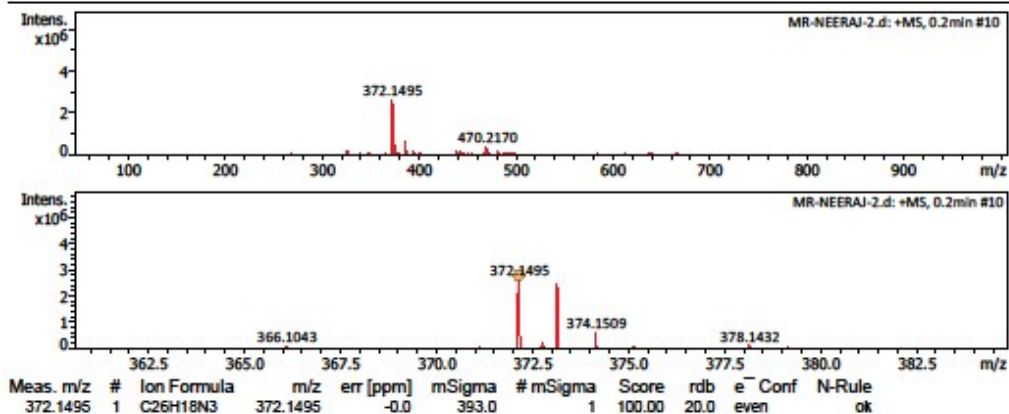

Figure SI 7: HRMS spectrum for 2.

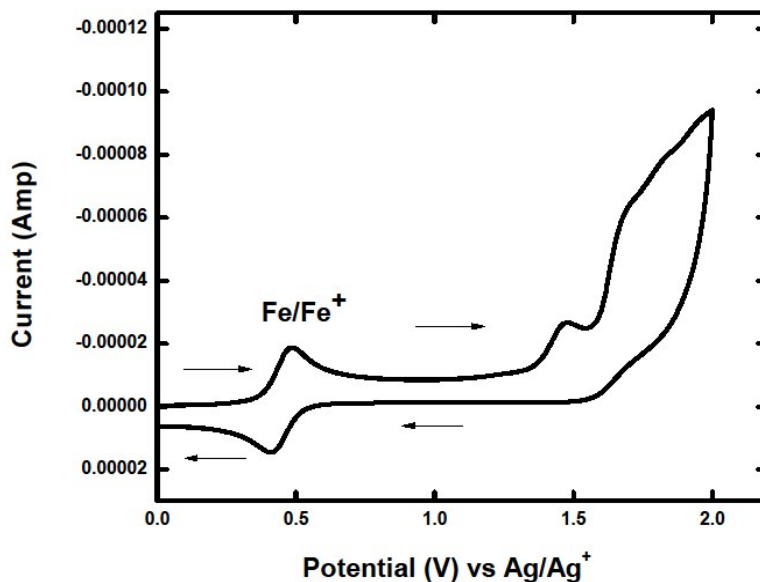

Figure SI 8: Cyclic voltammogram of 2



### Photophysical studies:

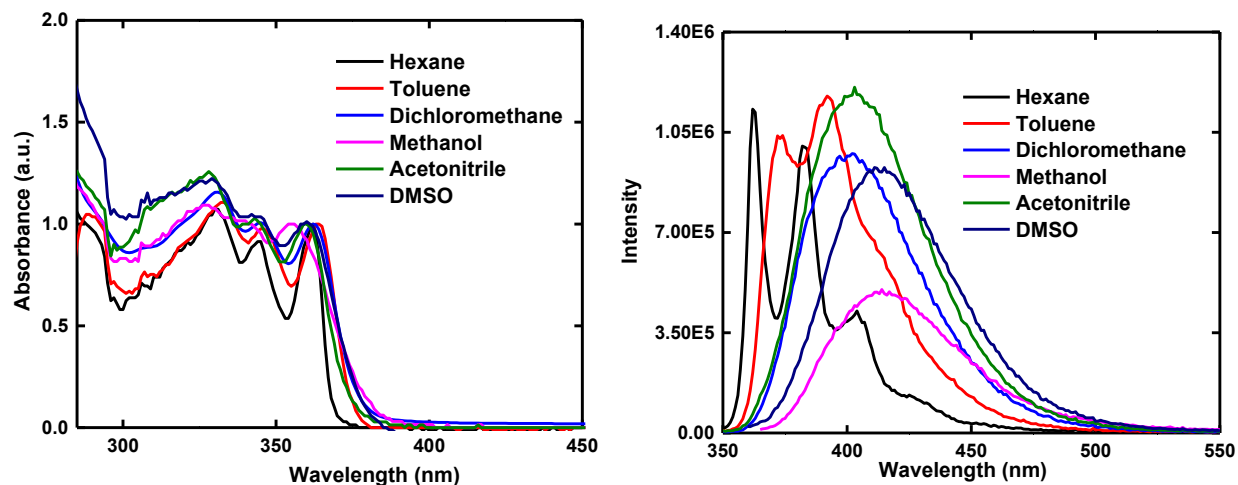

**Figure SI 9:** Absorption and emission spectra of **2** in different solvents

**Table SI 3:** Absorption and emission data of **2** in different solvents

| Solvent                | $\lambda_{\text{abs}}$ [nm], ( $\log \epsilon$ ) | $\lambda_{\text{em}}$ (nm) | Stoke shift ( $\text{cm}^{-1}$ ) | $\Phi_{\text{F}}$ | $E_{\text{g}}$ (eV) |
|------------------------|--------------------------------------------------|----------------------------|----------------------------------|-------------------|---------------------|
| Hexane                 | 361(4.05), 344(4.01),<br>329(4.07), 259(4.55)    | 381, 402                   | 2830                             | 71                | 3.37                |
| Toluene                | 363(4.14), 345(4.12),<br>332(4.18)               | 373, 391                   | 1970                             | 73                | 3.35                |
| DCM                    | 362(4.78), 345(3.82),<br>331(4.85)               | 396                        | 2370                             | 72                | 3.34                |
| $\text{CH}_3\text{OH}$ | 355(4.02), 326(4.06),<br>257(4.68)               | 415                        | 4070                             | 83                | 3.32                |
| $\text{CH}_3\text{CN}$ | 360(4.06), 345(4.06),<br>328(4.14), 258(4.71)    | 408                        | 3270                             | 84                | 3.35                |
| DMSO                   | 360(4.14), 342(4.15),<br>329(4.22)               | 414                        | 3620                             | 89                | 3.33                |

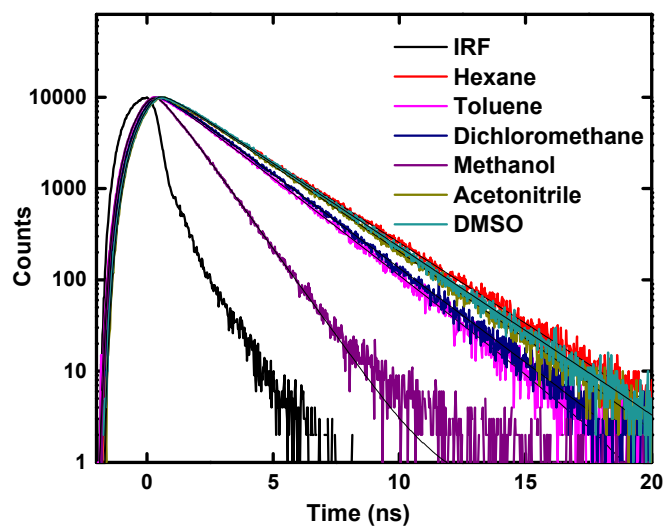

**Figure SI 10:** Fluorescence decay spectra of **2** in different solvents

**Table SI 4:** Fluorescence decay data of **2** in different solvents

| Solvent            | $\lambda_{em}(nm)$ | $\tau(ns)$ | $\alpha$ | Chi sq. |
|--------------------|--------------------|------------|----------|---------|
| Hexane             | 402                | 2.43,      | 100      | 1.00    |
| Toluene            | 391                | 2.03       | 100      | 1.27    |
| DCM                | 396                | 2.11       | 100      | 1.05    |
| CH <sub>3</sub> OH | 415                | 1.07       | 100      | 1.02    |
| CH <sub>3</sub> CN | 408                | 2.23       | 100      | 1.00    |
| DMSO               | 414                | 2.37       | 100      | 1.12    |

## Characterization and Spectroscopic data of 3

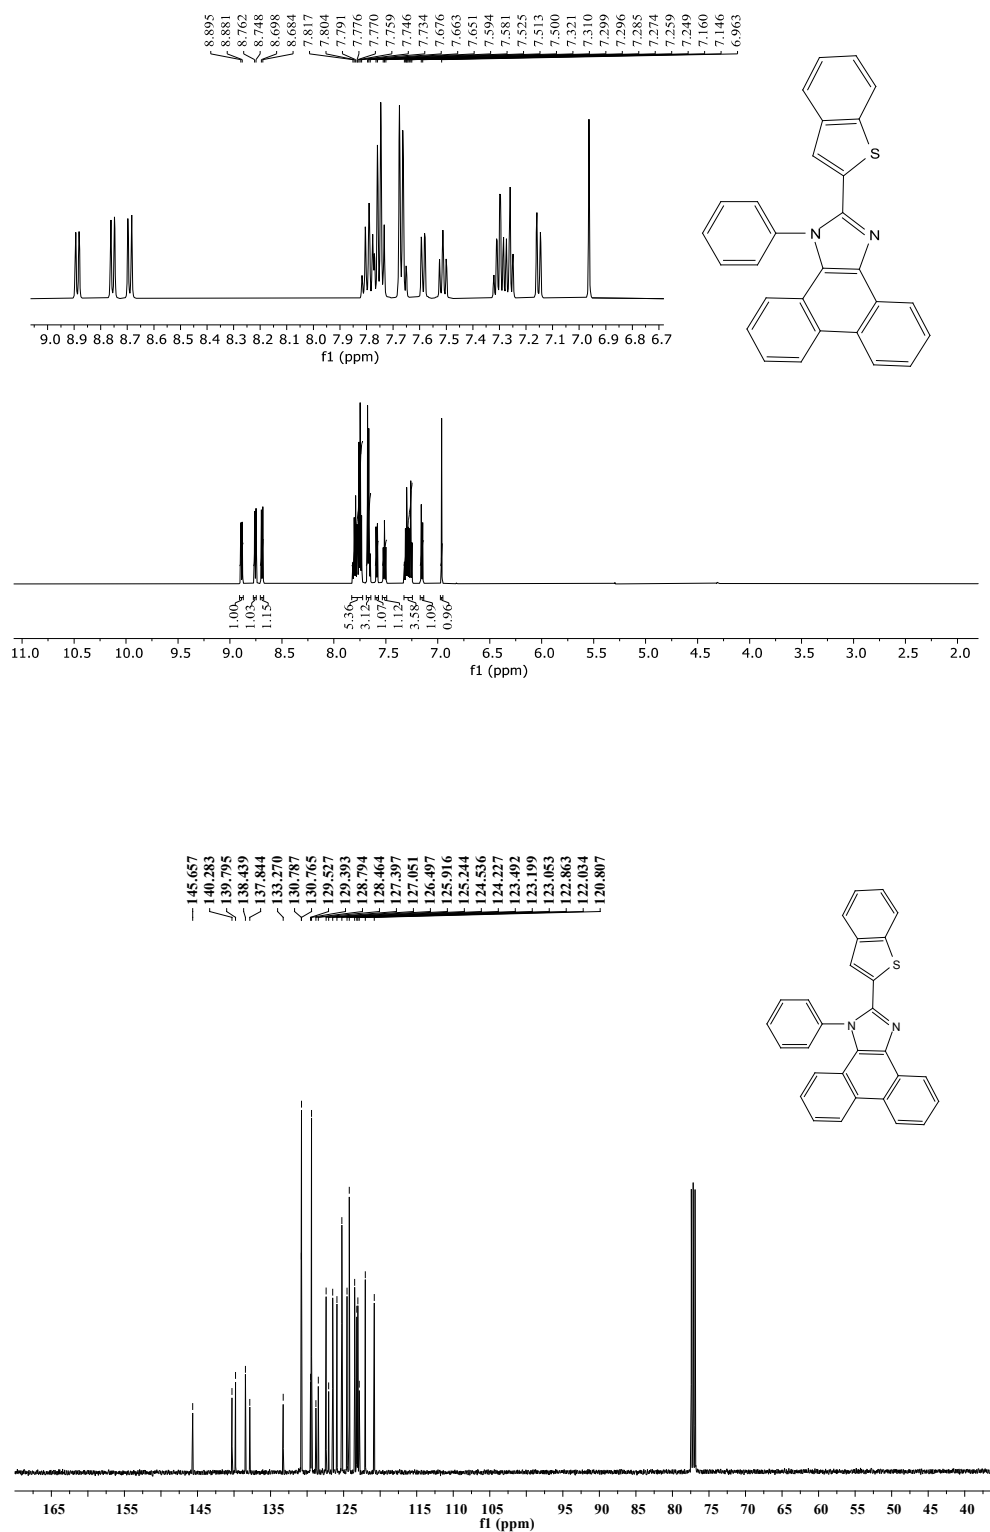

Figure SI 11:  $^1\text{H}$  NMR (top) and  $^{13}\text{C}$  NMR (bottom) spectra of **3** in  $\text{CDCl}_3$

DEPARTMENT OF CHEMISTRY, I.I.T.(B)

**Analysis Info**  
 Analysis Name D:\Data\JULY 2021\MR-NA-3-1.d  
 Method NaICSI\_pos\_1000-a.m  
 Sample Name MR-NA-3-1  
 Comment C29H18N2S  
 Acquisition Date 7/6/2021 7:11:30 PM  
 Operator SRK-IN  
 Instrument maXis impact 282001.00081

**Acquisition Parameter**

|             |            |                      |          |                  |           |
|-------------|------------|----------------------|----------|------------------|-----------|
| Source Type | ESI        | Ion Polarity         | Positive | Set Nebulizer    | 0.3 Bar   |
| Focus       | Not active | Set Capillary        | 3700 V   | Set Dry Heater   | 180 °C    |
| Scan Begin  | 50 m/z     | Set End Plate Offset | -500 V   | Set Dry Gas      | 4.0 l/min |
| Scan End    | 1000 m/z   | Set Charging Voltage | 2000 V   | Set Divert Valve | Source    |
|             |            | Set Corona           | 0 nA     | Set APCI Heater  | 0 °C      |

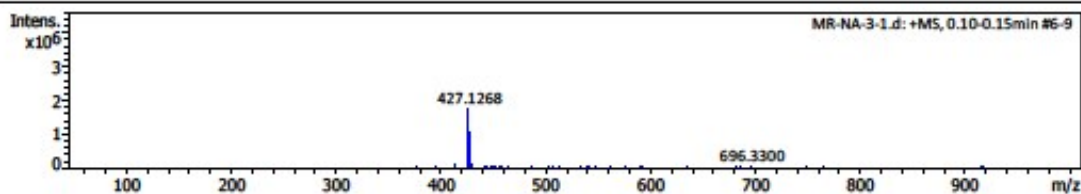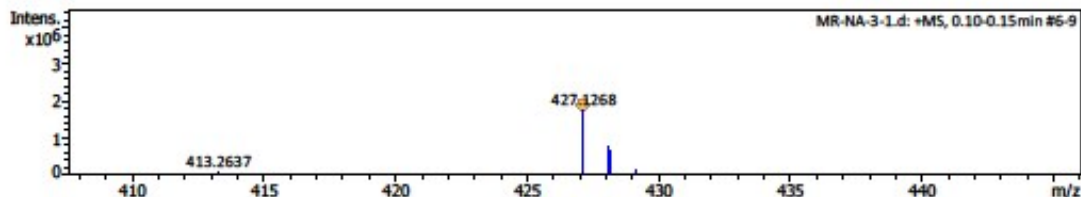

| Meas. m/z | # | Ion Formula | m/z      | err [ppm] | mSigma | # mSigma | Score  | rdb  | e <sup>-</sup> Conf | N-Rule |
|-----------|---|-------------|----------|-----------|--------|----------|--------|------|---------------------|--------|
| 427.1268  | 1 | C29H19N2S   | 427.1263 | -1.2      | 48.1   | 1        | 100.00 | 24.0 | even                | ok     |

Figure SI 12: HRMS spectrum of 3.

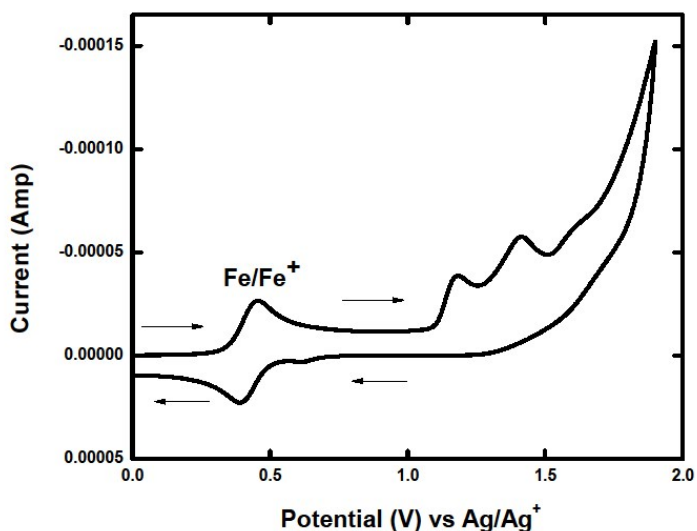

Figure SI 13: Cyclic voltammogram of 3

### Photophysical studies:

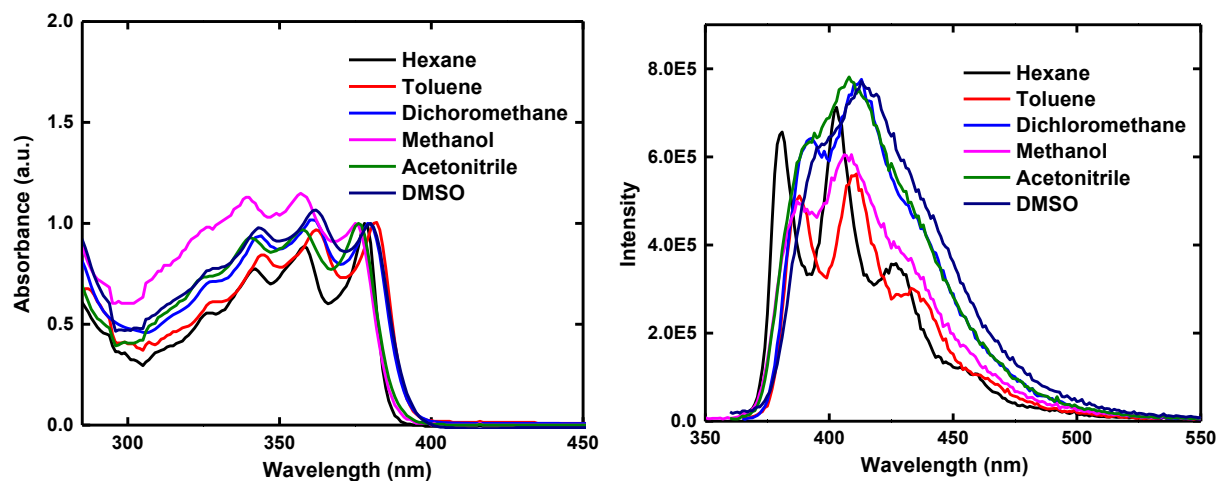

**Figure SI 14:** Absorption and emission spectra of **3** in different solvents

**Table SI 5:** Absorption and emission data of **3** in different solvents

| Solvent            | $\lambda_{\text{abs}}$ [nm], ( $\log \epsilon$ )         | $\lambda_{\text{em}}$ (nm) | Stoke shift ( $\text{cm}^{-1}$ ) | $\Phi_{\text{F}}$ | $E_{\text{g}}$ (eV) |
|--------------------|----------------------------------------------------------|----------------------------|----------------------------------|-------------------|---------------------|
| Hexane             | 378(5.45), 358(5.41), 342(5.36)<br>325(5.20), 262(5.63)  | 381, 403,<br>427.          | 1640                             | 55                | 3.26                |
| Toluene            | 381(5.56), 362(5.54),<br>344(5.48), 286(5.38)            | 387, 410                   | 1920                             | 68                | 3.25                |
| DCM                | 379(6.19), 361(6.20), 343(6.17),<br>263(6.33)            | 391, 411                   | 2050                             | 64                | 3.21                |
| CH <sub>3</sub> OH | 375(5.23), 357(5.29), 339(5.28),<br>259(5.58)            | 387, 407                   | 2090                             | 68                | 3.26                |
| CH <sub>3</sub> CN | 376(5.56), 357(5.54), 339(5.52),<br>325(5.42), 261(5.76) | 407                        | 2020                             | 72                | 3.24                |
| DMSO               | 379(5.73), 361(5.76), 343(5.71)                          | 414                        | 2230                             | 73                | 3.33                |

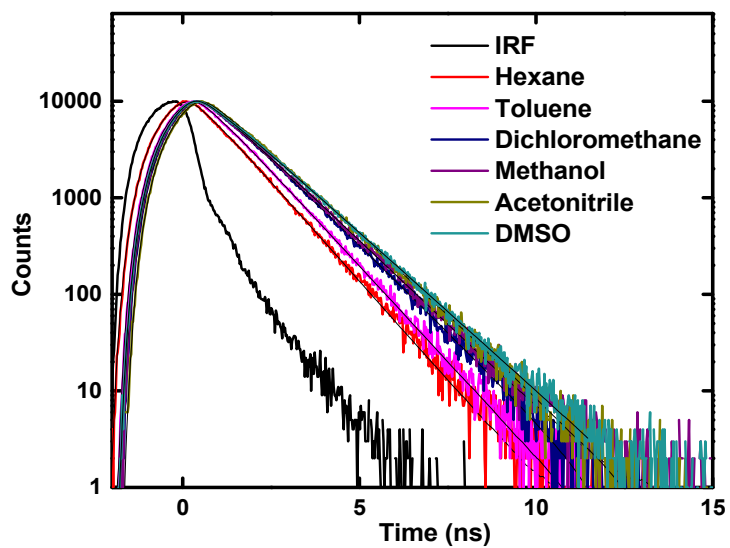

**Figure SI 15:** Fluorescence decay spectra of **3** in different solvents

**Table SI 6:** Fluorescence decay data of **3** in different solvents

| Solvent            | $\lambda_{em}(nm)$ | $\tau(ns)$ | $\alpha$ | Chi sq. |
|--------------------|--------------------|------------|----------|---------|
| Hexane             | 427.               | 1.00       | 100      | 1.01    |
| Toluene            | 410                | 1.06       | 100      | 1.07    |
| DCM                | 411                | 1.18       | 100      | 1.05    |
| CH <sub>3</sub> OH | 407                | 1.22       | 100      | 1.00    |
| CH <sub>3</sub> CN | 407                | 1.26       | 100      | 1.08    |
| DMSO               | 414                | 1.30       | 100      | 1.00    |

## Characterization and Spectroscopic data of 4

NMR:

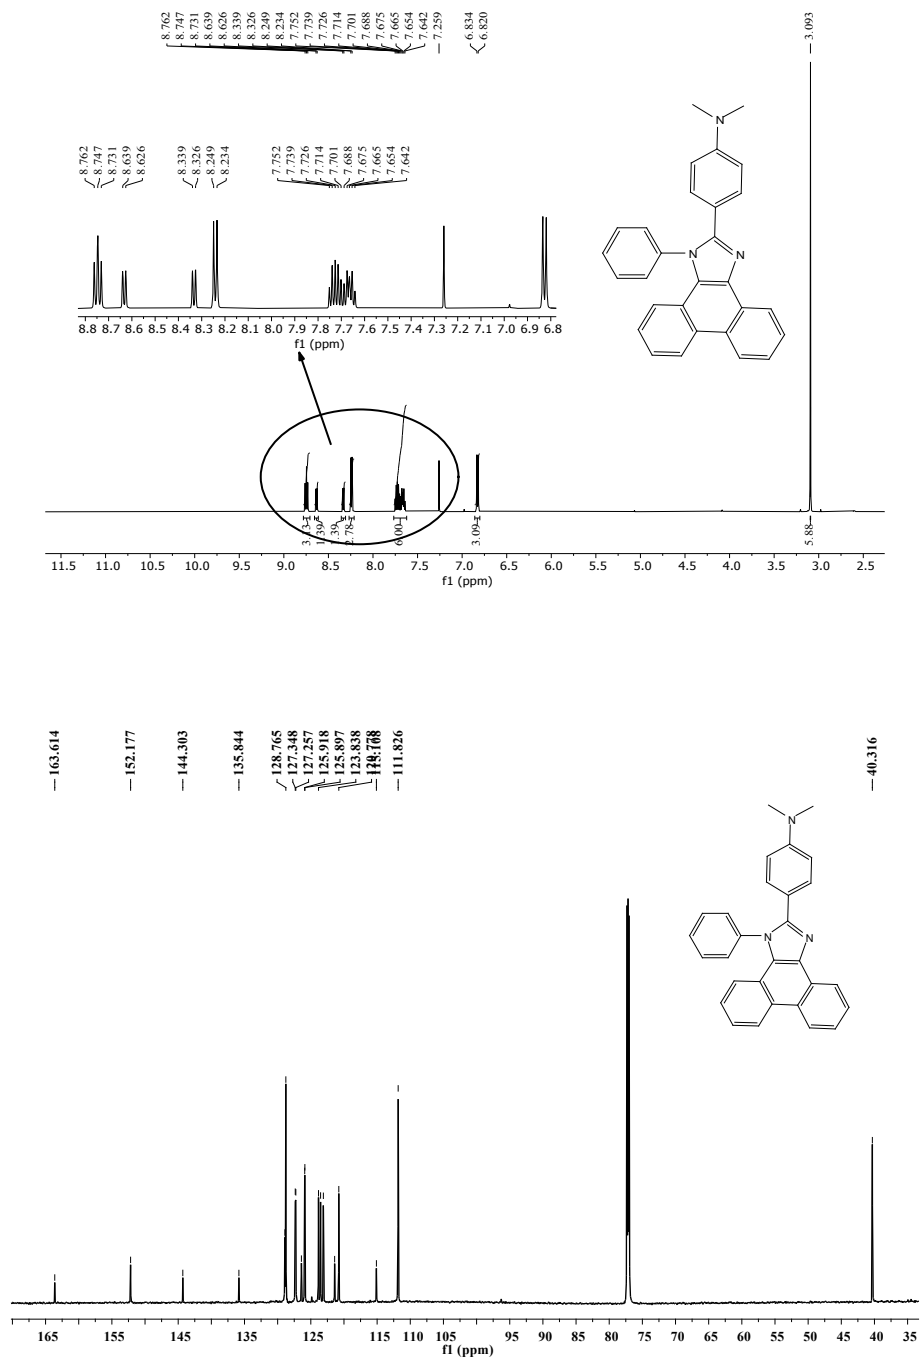

Figure SI 16:  $^1\text{H}$  NMR (top) and  $^{13}\text{C}$  NMR (bottom) spectra of **4** in  $\text{CDCl}_3$

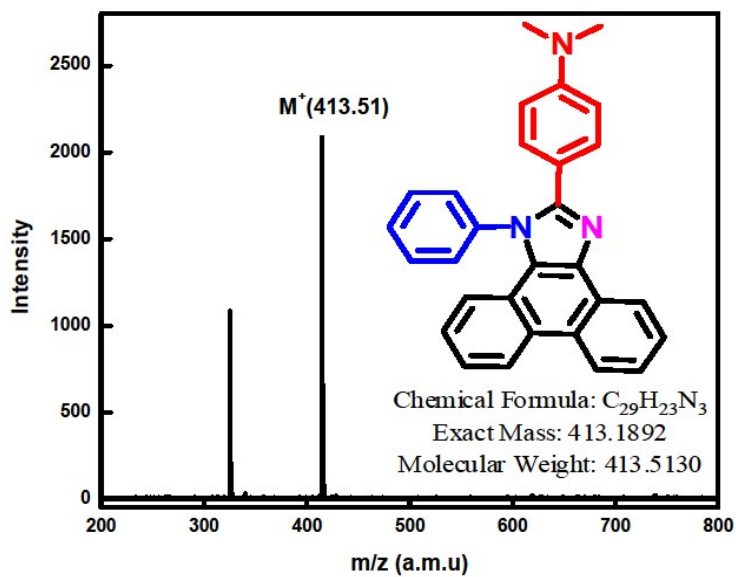

Figure SI 17: MALDI-TOF spectrum of 4

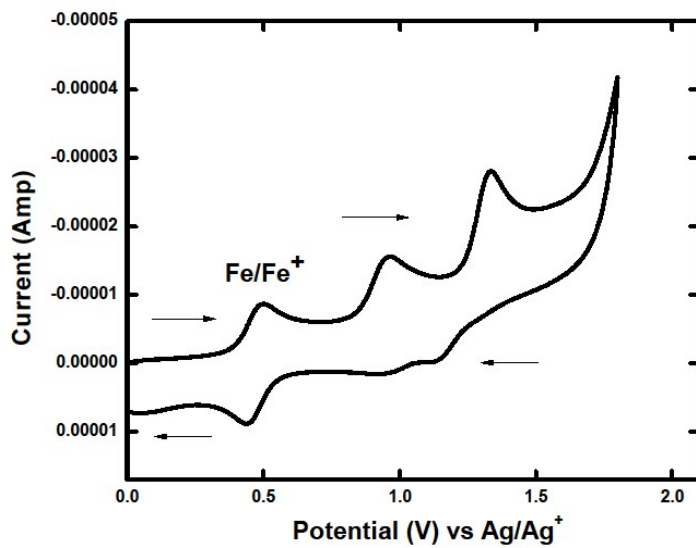

Figure SI 18: Cyclic voltammogram of 4.



Photophysical studies:

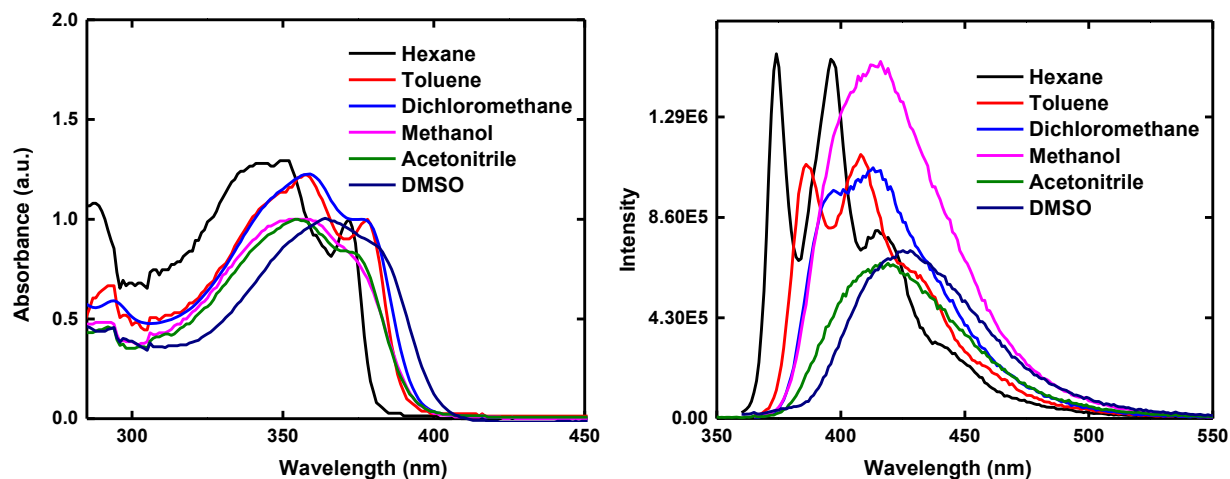

Figure SI 19: Absorption and emission spectra of **4** in different solvents

Table SI 7: Absorption and emission data of **4** in different solvents

| Solvent            | $\lambda_{\text{abs}}$ [nm], ( $\log \epsilon$ ) | $\lambda_{\text{em}}$ (nm) | Stoke shift ( $\text{cm}^{-1}$ ) | $\Phi_{\text{F}}$ | $E_{\text{g}}$ (eV) |
|--------------------|--------------------------------------------------|----------------------------|----------------------------------|-------------------|---------------------|
| Hexane             | 371(4.40), 346(4.51),<br>279(3.46), 257(4.65)    | 373, 396                   | 1700                             | 98                | 3.34                |
| Toluene            | 378(4.45), 357(4.53),<br>292(4.27)               | 386, 407.                  | 1880                             | 86                | 3.31                |
| DCM                | 379(4.29), 359(5.39),<br>261(5.40)               | 396, 411                   | 2050                             | 90                | 3.20                |
| CH <sub>3</sub> OH | 355(4.58), 258(4.63)                             | 413                        | 3950                             | 94                | 3.20                |
| CH <sub>3</sub> CN | 355(4.67), 258(4.66)                             | 417                        | 4180                             | 87                | 3.19                |
| DMSO               | 369(4.89)                                        | 429                        | 3790                             | 93                | 3.35                |

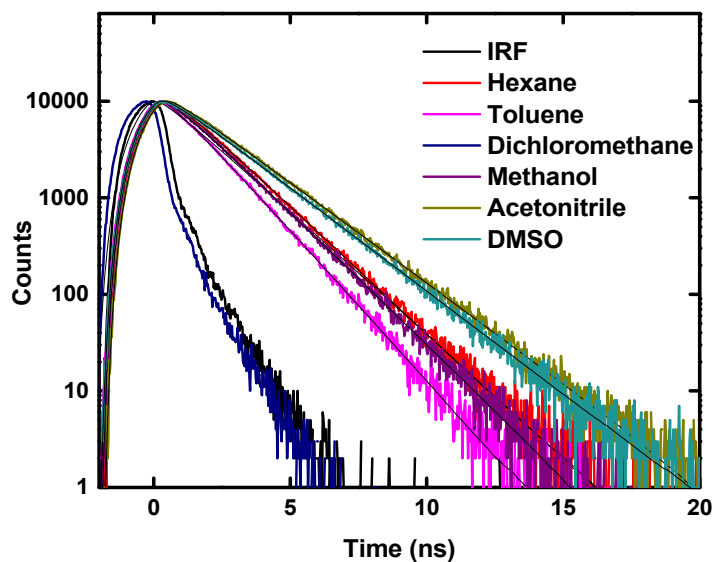

**Figure SI 20:** Fluorescence decay spectra of **4** in different solvents

**Table SI 8:** Fluorescence decay data of **4** in different solvents

| Solvent            | $\lambda_{em}(nm)$ | $\tau(ns)$ | $\alpha$ | Chi sq. |
|--------------------|--------------------|------------|----------|---------|
| Hexane             | 396                | 1.63.      | 100.     | 1.00    |
| Toluene            | 407.               | 1.37       | 100      | 1.09    |
| DCM                | 411                | 1.58       | 100      | 1.05    |
| CH <sub>3</sub> OH | 413                | 1.59       | 100      | 1.02    |
| CH <sub>3</sub> CN | 417                | 2.08       | 100      | 1.04    |
| DMSO               | 429                | 2.02       | 100      | 1.01    |

## Characterization and Spectroscopic data of 5

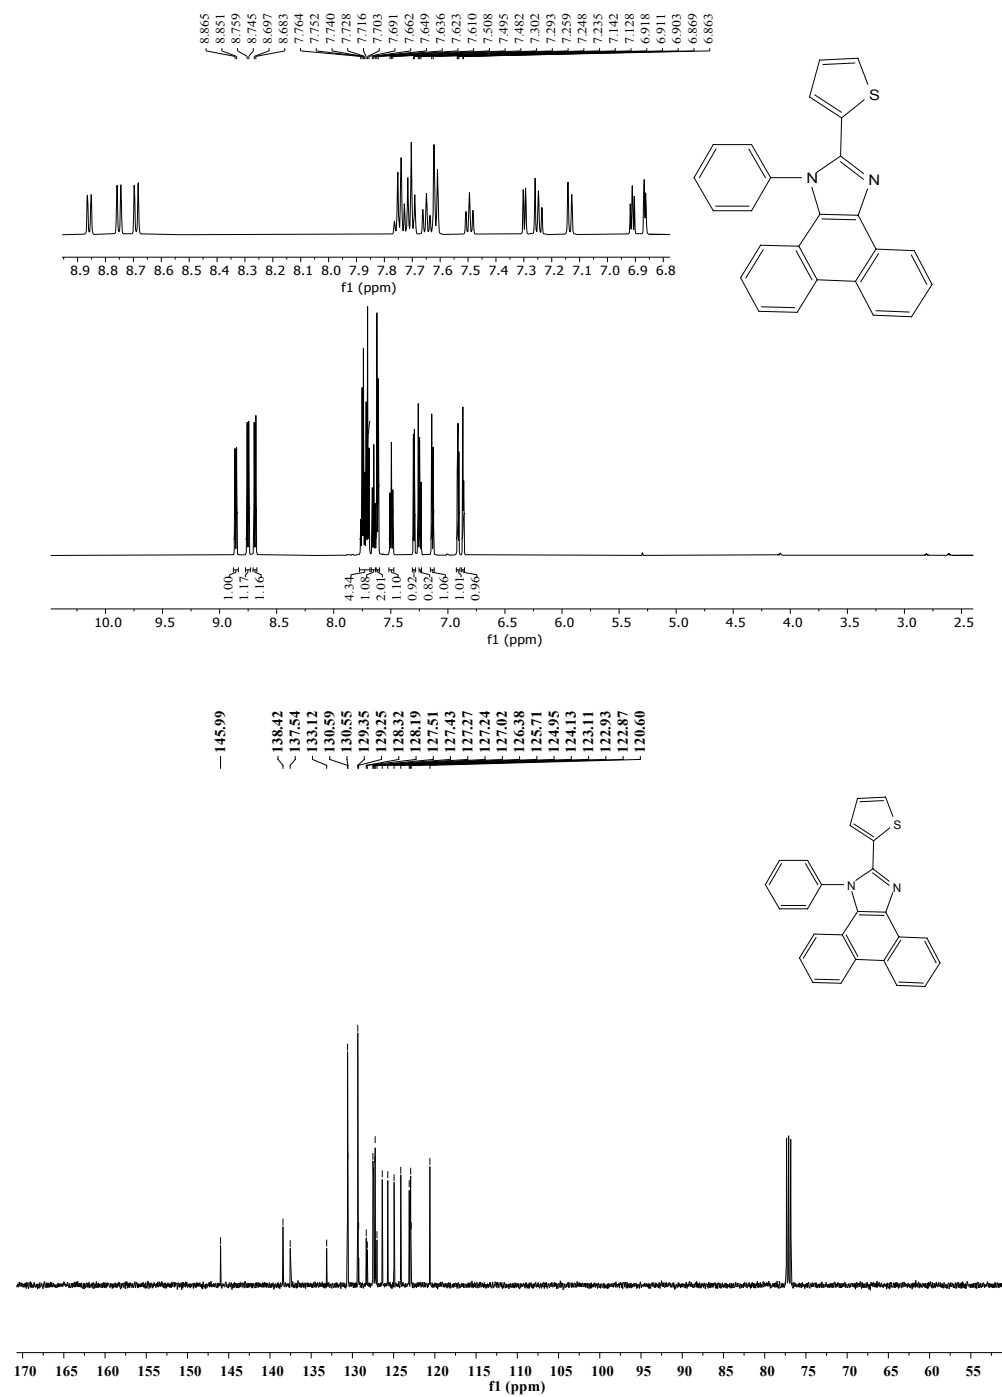

Figure SI 21: <sup>1</sup>H NMR (top) and <sup>13</sup>C NMR (bottom) spectra of 5 in CDCl<sub>3</sub>

DEPARTMENT OF CHEMISTRY, I.I.T.(B)

|               |                             |                                      |                           |
|---------------|-----------------------------|--------------------------------------|---------------------------|
| Analysis Info |                             | Acquisition Date 7/8/2021 7:03:23 PM |                           |
| Analysis Name | D:\Data\JULY 2021\MR-NA-5.d | Operator                             | SRK-IN                    |
| Method        | NaICsl_pos_1000-a.m         | Instrument                           | maXis impact 282001.00081 |
| Sample Name   | gkl-ls-ac-azo               |                                      |                           |
| Comment       | C25H18N2S                   |                                      |                           |

|                       |            |                      |          |                  |           |
|-----------------------|------------|----------------------|----------|------------------|-----------|
| Acquisition Parameter |            |                      |          |                  |           |
| Source Type           | ESI        | Ion Polarity         | Positive | Set Nebulizer    | 0.3 Bar   |
| Focus                 | Not active | Set Capillary        | 3700 V   | Set Dry Heater   | 180 °C    |
| Scan Begin            | 50 m/z     | Set End Plate Offset | -500 V   | Set Dry Gas      | 4.0 l/min |
| Scan End              | 1000 m/z   | Set Charging Voltage | 2000 V   | Set Divert Valve | Source    |
|                       |            | Set Corona           | 0 nA     | Set APCI Heater  | 0 °C      |

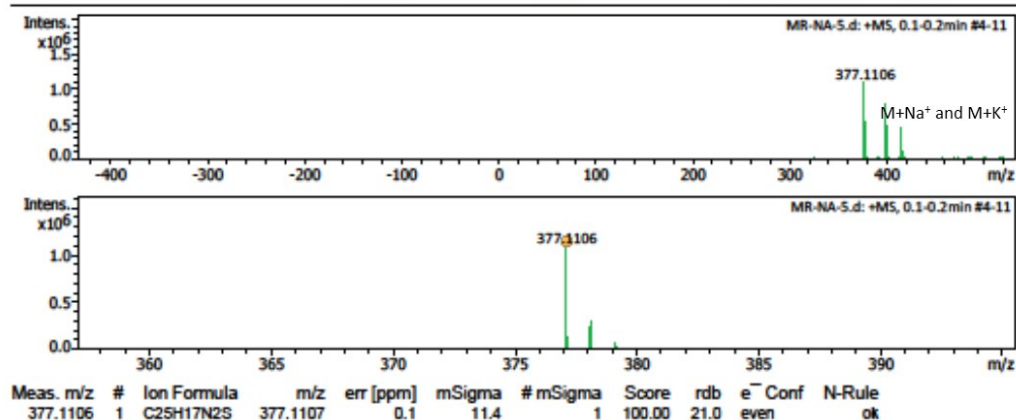

Figure SI 22: HRMS spectrum of 5.

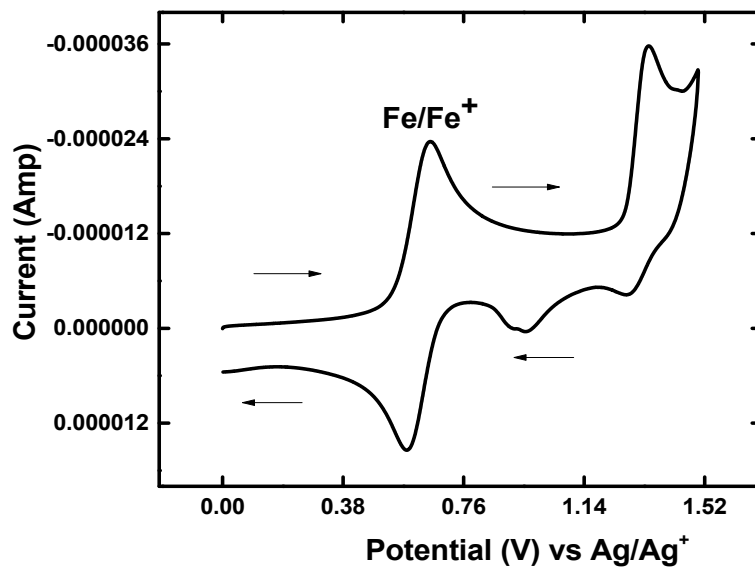

Figure SI 23: Cyclic voltammogram of 5.

Photophysical studies:

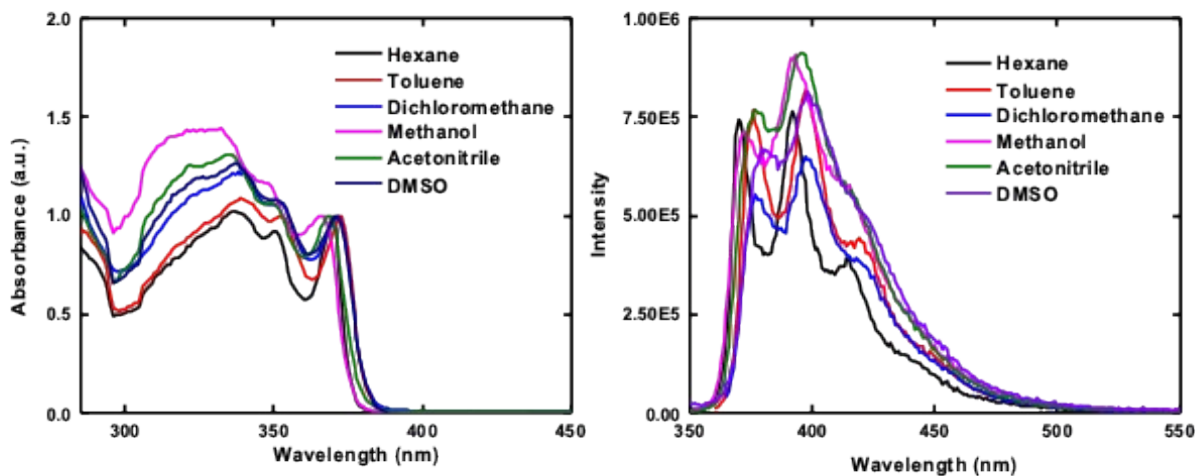

Figure SI 24: Absorption and emission spectra of **5** in different solvents

Table SI 9: Absorption and emission data of **5** in different solvents

| Solvent            | $\lambda_{\text{abs}}$ [nm], ( $\log \epsilon$ ) | $\lambda_{\text{em}}$ (nm) | Stoke shift ( $\text{cm}^{-1}$ ) | $\Phi_F$ | $E_g$ (eV) |
|--------------------|--------------------------------------------------|----------------------------|----------------------------------|----------|------------|
| Hexane             | 369(4.63), 350(4.60),<br>337(4.64), 263(4.99)    | 371, 392, 414.             | 1590                             | 48       | 3.37       |
| Toluene            | 372(3.98), 353(4.65),<br>339(4.69), 285(4.63)    | 376, 397                   | 1700                             | 58       | 3.30       |
| DCM                | 371(5.25), 352(5.27),<br>338(5.34), 263(5.53)    | 376, 397                   | 1770                             | 53       | 3.30       |
| CH <sub>3</sub> OH | 366(4.31), 347(4.37),<br>325(4.46), 260(4.92)    | 372,393                    | 1880                             | 53       | 3.38       |
| CH <sub>3</sub> CN | 368(4.60), 349(4.63),<br>332(4.71), 261(5.10)    | 376, 395, 413              | 1860                             | 53       | 3.35       |
| DMSO               | 372(4.67), 353(4.70),<br>336(4.77), 264(5.20)    | 394                        | 1500                             | 57       | 3.35       |

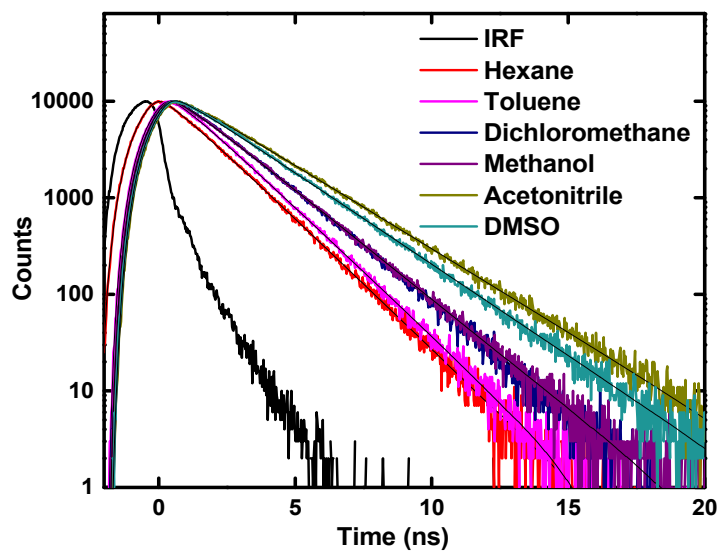

**Figure SI 25:** Fluorescence decay spectra of **5** in different solvents

**Table SI 10:** Fluorescence decay data of **5** in different solvents

| Solvent            | $\lambda_{em}$ (nm) | $\tau$ (ns) | $\alpha$ | Chi sq. |
|--------------------|---------------------|-------------|----------|---------|
| Hexane             | 392                 | 1.60        | 100.     | 1.05    |
| Toluene            | 397                 | 1.62        | 100      | 1.05    |
| DCM                | 397                 | 1.90        | 100      | 1.05    |
| CH <sub>3</sub> OH | 393                 | 1.91        | 100      | 1.08    |
| CH <sub>3</sub> CN | 395                 | 2.52        | 100      | 1.09    |
| DMSO               | 394                 | 2.29        | 100      | 1.15    |

## Characterization and Spectroscopic data of 6

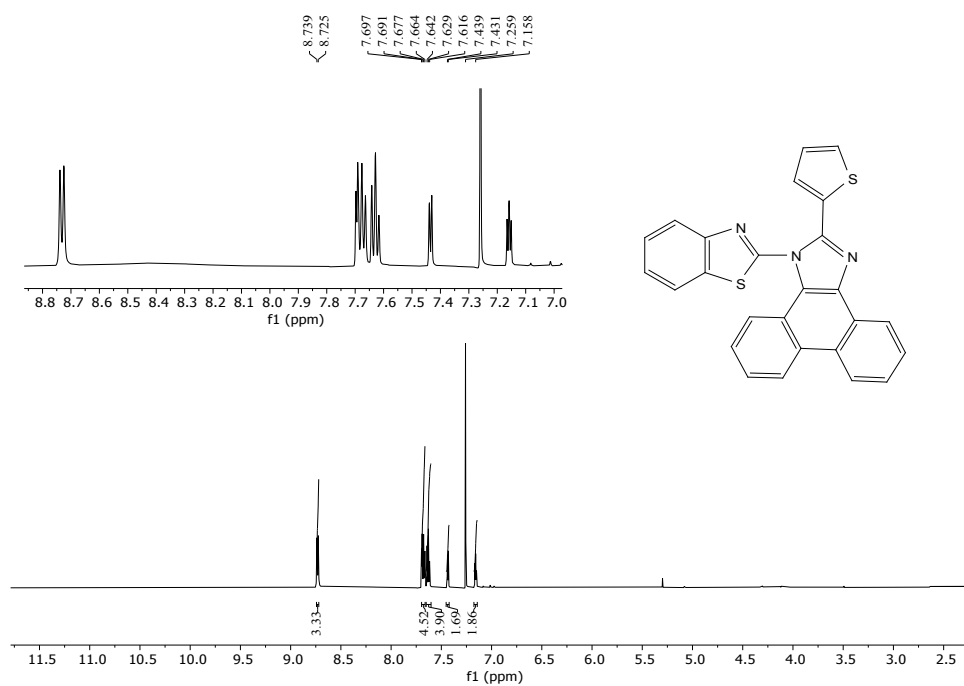

Figure SI 26:  $^1\text{H}$  NMR spectra of **6** in  $\text{CDCl}_3$

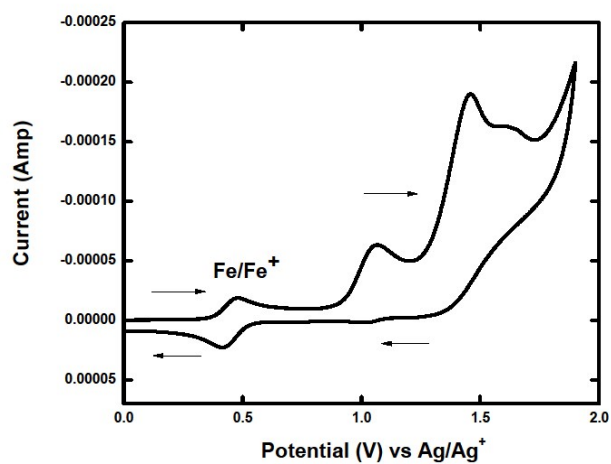

Figure SI 27: Cyclic voltammetry of **6**.

Photophysical studies:

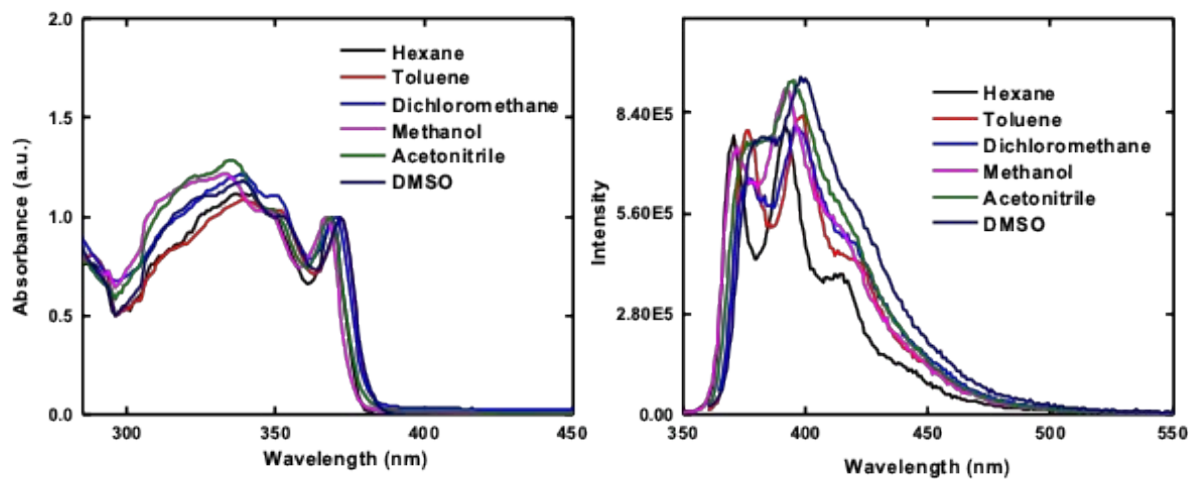

Figure SI 28: Absorption and emission spectra of **6** in different solvents

Table SI 11: Absorption and emission data of **6** in different solvents

| Solvent            | $\lambda_{\text{abs}}$ [nm], ( $\log \epsilon$ )            | $\lambda_{\text{em}}$ (nm) | Stoke shift ( $\text{cm}^{-1}$ ) | $\Phi_{\text{F}}$ | $E_{\text{g}}$ (eV) |
|--------------------|-------------------------------------------------------------|----------------------------|----------------------------------|-------------------|---------------------|
| Hexane             | 369(4.11), 337(5.16),<br>262(6.91)                          | 371, 391,<br>414           | 1530                             | 51                | 3.38                |
| Toluene            | 372(5.63), 339(5.67),<br>288(5.54)                          | 376, 397                   | 1700                             | 65                | 3.34                |
| DCM                | 370(6.25), 338(6.34), 258(6.48)                             | 376, 396                   | 1770                             | 54                | 3.31                |
| CH <sub>3</sub> OH | 367(5.62), 348(5.64),<br>331(6.13), 261(6.09)               | 373, 392                   | 1730                             | 66                | 3.38                |
| CH <sub>3</sub> CN | 368(5.45), 349(5.46),<br>325(5.56), 262(5.88),<br>255(5.82) | 376, 395                   | 1860                             | 56                | 3.36                |
| DMSO               | 372(5.85), 352(5.86),<br>338(5.92), 265(6.30)               | 396                        | 1630                             | 68                | 3.31                |



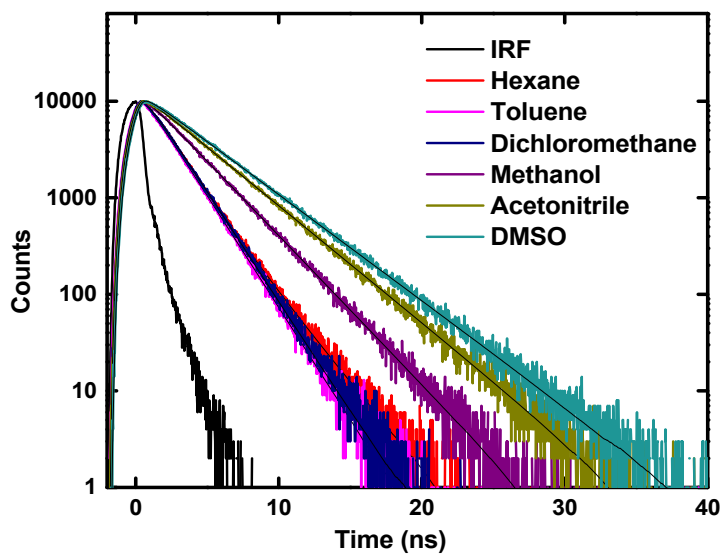

**Figure SI 29:** Fluorescence decay spectra of **6** in different solvents

**Table SI 12:** Fluorescence decay data of **6** in different solvents

| Solvent            | $\lambda_{em}$ (nm) | $\tau_1$ (ns) | $\alpha$ | Chi sq |
|--------------------|---------------------|---------------|----------|--------|
| Hexane             | 414.                | 1.59          | 100      | 1.00   |
| Toluene            | 397                 | 1.87.         | 100      | 1.09   |
| DCM                | 396                 | 1.90          | 100      | 1.18   |
| CH <sub>3</sub> OH | 392                 | 2.82          | 100      | 1.06   |
| CH <sub>3</sub> CN | 395                 | 3.58          | 100      | 1.02   |
| DMSO               | 396                 | 3.95          | 100      | 1.09   |

## Characterization and Spectroscopic data of 7

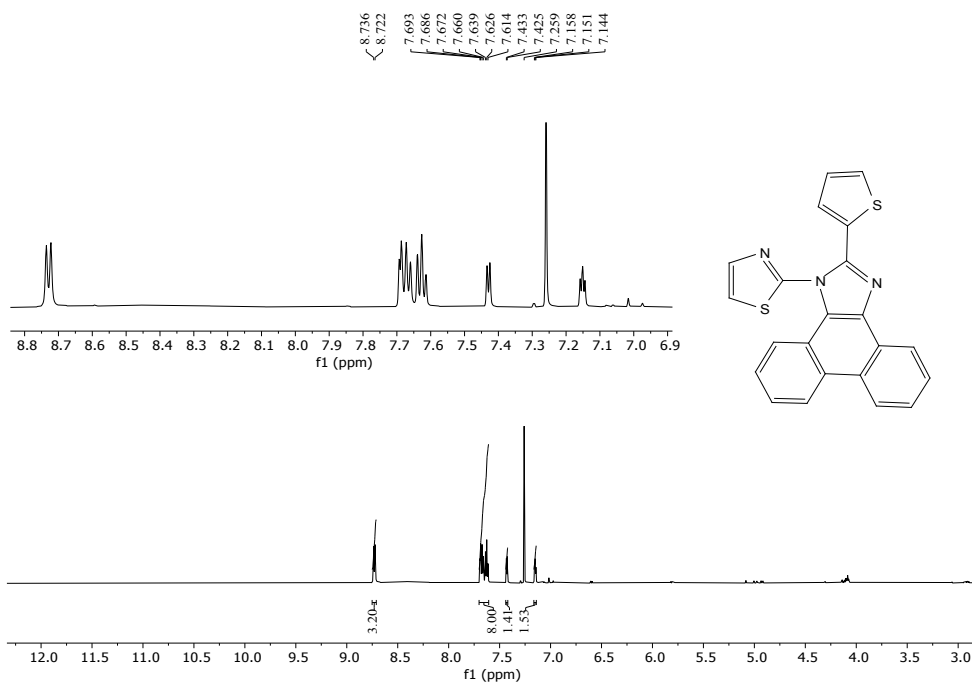

Figure SI 30: <sup>1</sup>H NMR spectrum of 7 in CDCl<sub>3</sub>

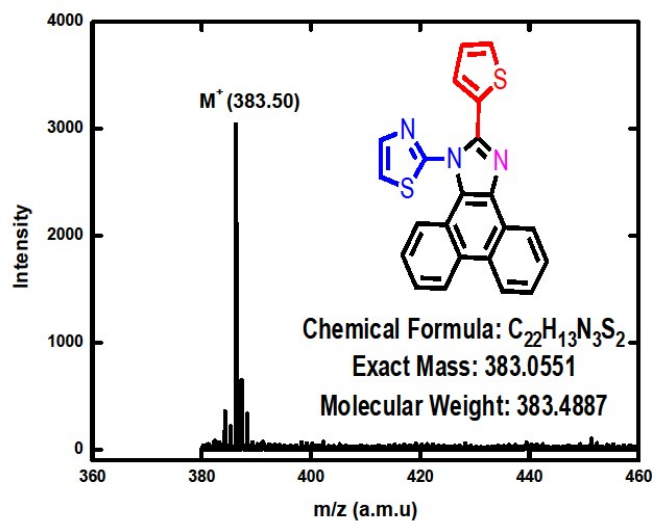

Figure SI 31: MALDI-TOF spectrum of 7.

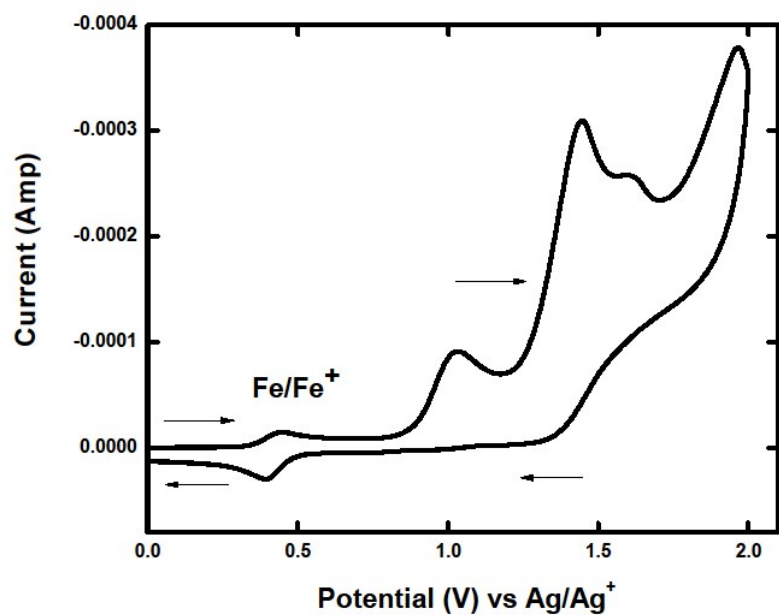

Figure SI 32: Cyclic voltammogram of 7.

Photophysical studies:

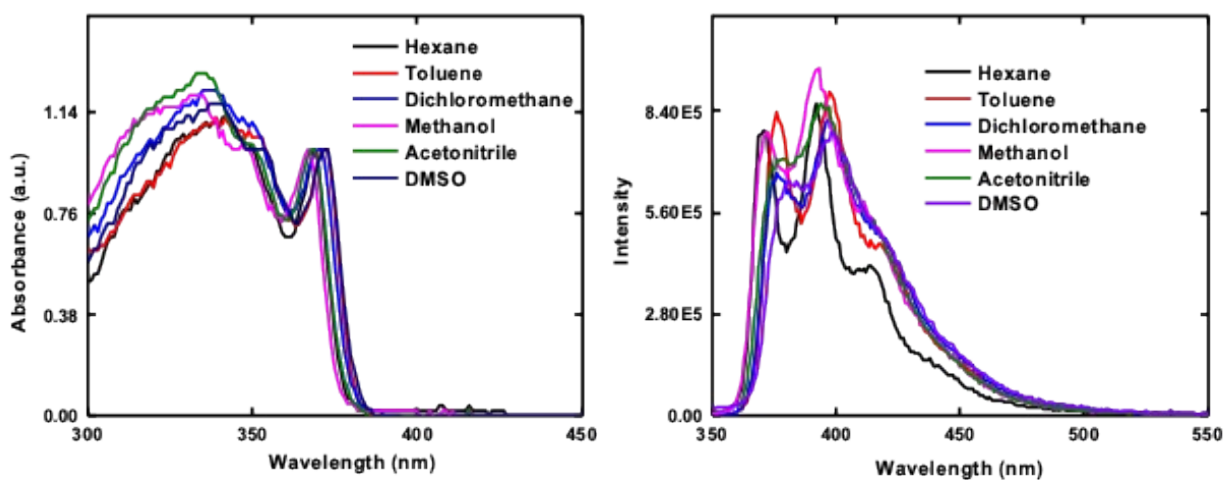

Figure SI 33: Absorption and emission spectra of 7 in different solvents

**Table SI 13:** Absorption and emission data of **7** in different solvents

| Solvent            | $\lambda_{\text{abs}}$ [nm], ( $\log \epsilon$ ) | $\lambda_{\text{em}}$ (nm) | Stoke shift ( $\text{cm}^{-1}$ ) | $\Phi_{\text{F}}$ | $E_{\text{g}}$ (eV) |
|--------------------|--------------------------------------------------|----------------------------|----------------------------------|-------------------|---------------------|
| Hexane             | 372(4.93), 341(4.98),<br>286(5.23), 263(5.33)    | 373, 396, 416              | 1629                             | 48                | 3.33                |
| Toluene            | 372(5.08), 338(5.12),<br>291(5.02)               | 376, 396.                  | 1629                             | 62                | 3.31                |
| DCM                | 370(5.95), 337(6.03),<br>264(6.41)               | 375, 396                   | 1774                             | 50                | 3.34                |
| CH <sub>3</sub> OH | 368(4.97), 327(5.07),<br>261(5.46)               | 371, 391                   | 1598                             | 61                | 3.37                |
| CH <sub>3</sub> CN | 368(4.90), 328(5.02),<br>262(5.47)               | 377, 394                   | 1793                             | 56                | 3.36                |
| DMSO               | 372(5.29), 330(5.36)                             | 394                        | 1501                             | 63                | 3.36                |

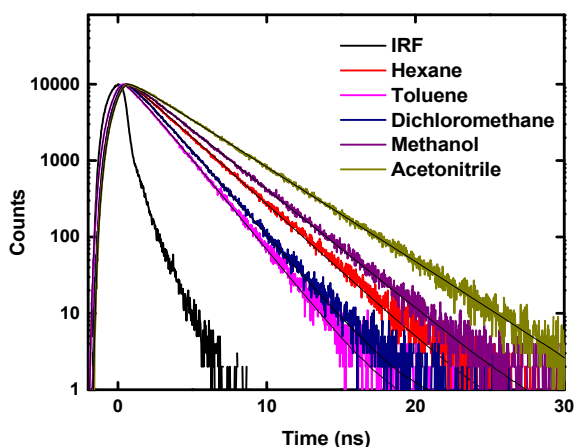**Figure SI 34:** Fluorescence decay spectra of **7** in different solvents**Table SI 14:** Fluorescence decay data of **7** in different solvents

| Solvent            | $\lambda_{\text{em}}$ (nm) | $\tau_1$ (ns) | $\alpha$ | Chi sq |
|--------------------|----------------------------|---------------|----------|--------|
| Hexane             | 416                        | 1.83          | 100      | 1.06   |
| Toluene            | 396                        | 1.96          | 100      | 1.20   |
| DCM                | 396                        | 1.83          | 100      | 1.07   |
| CH <sub>3</sub> OH | 391                        | 2.79          | 100      | 1.00   |
| CH <sub>3</sub> CN | 394                        | 3.51          | 100      | 1.01   |
| DMSO               | 394                        |               | 100      |        |

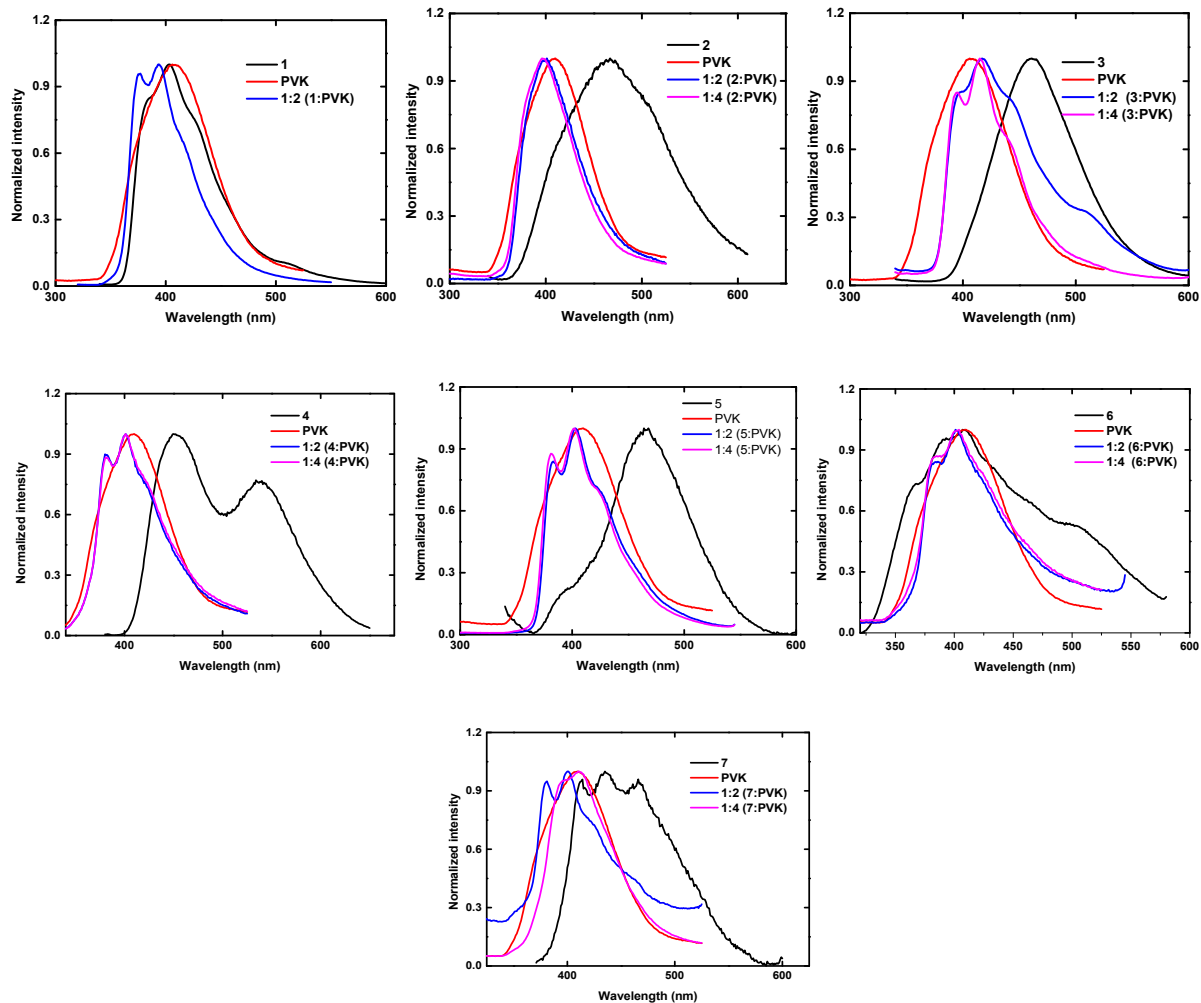

**Figure SI 35:** Emission spectra in thin films of 1-7, PVK and their blends

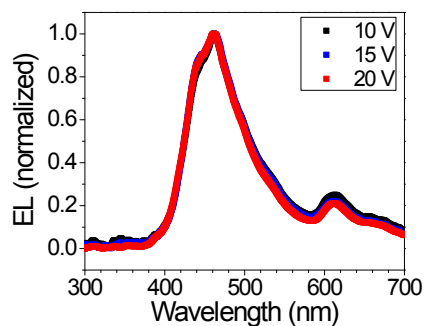

**Figure SI 36:** Electroluminescence of OLEDs fabricated from 5 at different driving voltage
